# Supplementary material
Source: Research Square preprint supplement (doi:10.21203/rs.3.rs-10194388/v1)
Supplement: Supplementary file 1 [file 35b6619eed4d2ff7c1b0732e.docx]

# Supplementary Information - Paper 1 (CO₂ x Si wheat)

The two-way ANOVA summary below is provided as Online Resource 1. The full per-replicate raw-data package and analysis scripts are deposited in Zenodo (see Data availability).

**Online Resource 1** Two-way ANOVA summary for headline traits. TBARS values are at the biological-replicate level (pots, n = 3 to 4), each replicate the mean of its technical readings with negatives excluded; for this right-skewed marker the CO₂ × Si interaction on the log scale is P = 0.10 (Exp 1) and P = 0.029 (Exp 2).

| **Trait** | **ACO₂** | **ECO₂** | **ACO₂+Si** | **ECO₂+Si** | **CO₂ p** | **Si p** | **CO₂×Si p** |
| --- | --- | --- | --- | --- | --- | --- | --- |
| **Maturity biomass (g)** | 7.82 | 9.80 | 11.19 | 10.47 | 0.166 | <0.001 | 0.006 |
| **Spike mass (g)** | 3.59 | 6.60 | 6.96 | 6.39 | 0.037 | 0.009 | 0.004 |
| **Day-20 biomass (g)** | 0.80 | 1.03 | 1.16 | 1.12 | 0.127 | 0.002 | 0.037 |
| **TBARS Exp 1 (µmol g⁻¹)** | 1.77 | 0.59 | 0.90 | 0.56 | 0.019 | 0.159 | 0.183 |
| **TBARS Exp 2 (µmol g⁻¹)** | 1.44 | 0.62 | 0.84 | 0.91 | 0.094 | 0.471 | 0.054 |
| **SA (ng g⁻¹)** | 51.1 | 114.7 | 29.5 | 68.9 | <0.001 | <0.001 | 0.023 |
| **JA (ng g⁻¹)** | 6.24 | 8.79 | 14.53 | 10.24 | 0.275 | <0.001 | <0.001 |
| **Leaf N (%)** | 1.45 | 1.34 | 1.13 | 1.09 | <0.001 | <0.001 | 0.030 |
| **Grain N (%)** | 3.82 | 4.01 | 2.49 | 2.57 | <0.001 | <0.001 | 0.066 |
